# Supplementary material
Source: publisher figshare collection journal article supplement (https://sage.figshare.com/ndownloader/files/12370880)
Supplement: Supplementary file 1 [file 12370880]

## **Supplemental Material For**

### **Identification of cosalane as an inhibitor of human and murine CC-Chemokine Receptor 7 signaling via a high throughput screen**

Emily A Hull-Ryde, Melissa A Porter, Kenneth A Fowler, Dmitri Kireev, Kelin Li,  
Catherine D Simpson, Maria F Sassano, Mark J Suto, Kenneth H Pearce, William  
Janzen, James M Coghill

Address correspondence to:

James M. Coghill, MD

Lineberger Comprehensive Cancer Center

University of North Carolina at Chapel Hill

Chapel Hill, North Carolina 27599

Email: [jcoghill@email.unc.edu](mailto:jcoghill@email.unc.edu)

Phone: 919-843-7237

## Supplemental Figure 1

### Luminescence Upon Human CCR7 Ligation by Agonist

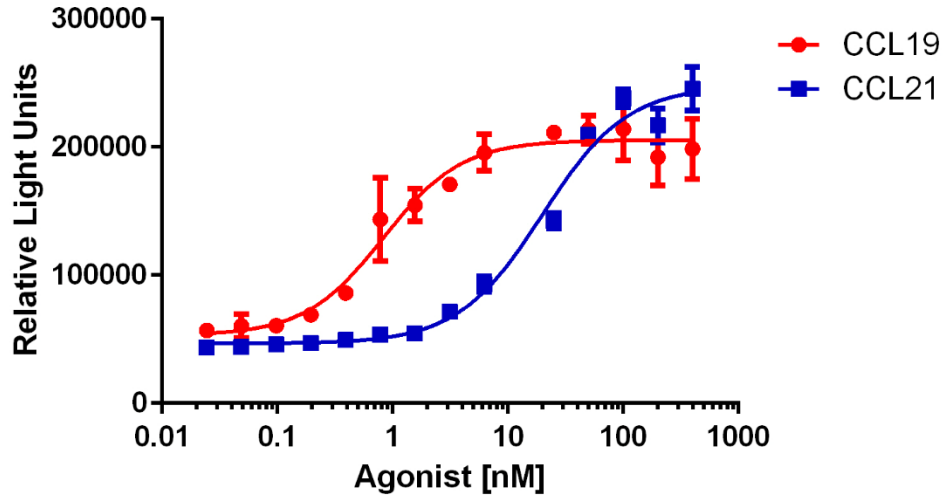

**Supplemental Figure 1: Representative Chemi-luminescence Curves for DiscoverX PathHunter®  $\beta$ -Arrestin CHO K1 cells expressing human CCR7 with increasing concentrations of agonist. Typical EC80s for hCCR7/CCL19 and hCCR7/CCL21 were 7nM and 25nM respectively.**

## Supplemental Figure 2

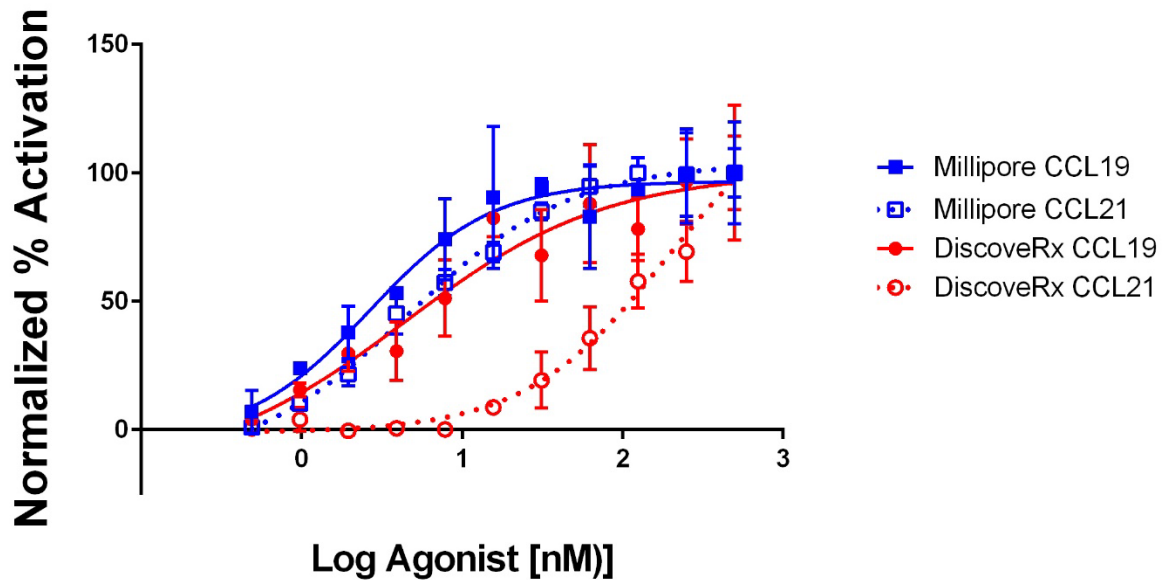

|           | Millipore CCL19 | DiscoverRx CCL19 | Millipore CCL21 | DiscoverRx CCL21 |
|-----------|-----------------|------------------|-----------------|------------------|
| EC50 (nM) | 2.656           | 4.386            | 4.540           | 192.9            |

### Supplemental Figure 2: The potencies of CCL19 and CCL21 for G protein

**associated calcium flux vary by cell type.** Calcium flux in response to CCL19 and

CCL21 was evaluated using FLIPR detection in Chem-1 CCR7 cells (Millipore)

expressing high levels of the recombinant promiscuous G protein Gα15 and in

PathHunter® CHO-K1 CCR7 β-Arrestin cells (DiscoverRx) expressing native G protein.

EC50s for each cell type according to agonist are depicted.

### Supplemental Methods:

Human Chem-1 cells were purchased from Millipore in ready to use format for calcium

flux assays (Catalogue number HTS012RTA; Burlington, Massachusetts).

PathHunter<sup>®</sup> CHO-K1 CCR7  $\beta$ -Arrestin cells (Catalogue number 93-0195C2) were obtained from DiscoverX (Fremont, California).

Cells were plated into Poly-L-Lysine (PLL) coated 384-well black clear bottom cell culture plates in plating media supplemented with 1% dialyzed FBS at a density of 12,000 cells in 30 $\mu$ l per well for each cell line and cultured overnight before assay. One hour prior to assay, media was aspirated from the wells and 20 $\mu$ l of Fluo-4 Direct<sup>®</sup> dye-loading solution (Invitrogen; Carlsbad, California) prepared according to the manufacturer's instructions were added per well. After a one hour incubation at room temperature, a FLIPR<sup>TETRA</sup><sup>®</sup> system (Molecular Devices; Sunnyvale, California) was used to read fluorescence (excitation wavelength: 470-495 nm, emission wavelength: 515-575 nm) to establish an individual baseline reading for each well (average value of 10 readings before ligand addition). This initial fluorescence intensity was used to correct each kinetic trace for well-to-well variability in loading of the cells. Next, the FLIPR<sup>TETRA</sup><sup>®</sup> transferred 10  $\mu$ l of the ligand solution, CCL19 or CCL21, from the drug plate to the cell plate. Readings were made every 1 second for 5 minutes. Data was collected using FLIPR's ScreenWorks<sup>®</sup> software (Molecular Devices) and exported with the built-in batch export function. Maximal fluorescence intensity readings (RFU, Relative Fluorescence Unit) were determined within a minute after ligand addition as agonist activity, and values were exported to MicroSoft Excel as "fold of basal". Each well was transformed using the equation  $((\text{well value} - \text{basal}) / (\text{max} - \text{basal})) * 100$  equals % normalized activation where basal levels are transformed to 0% and 'max' is the maximum reference agonist value transformed to 100% for each cell line. Average

values (n=3) with standard deviation error bars were plotted with Prism and fit with 4-parameter curves for EC<sub>50</sub> determinations.

### Supplemental Table

| Compound Name             | Lot Number          | hCCR7/<br>CCL19<br>IC50<br>( $\mu$ M) | Counterscreen | Cytotoxicity<br>( $\mu$ M) | hCCR7/<br>CCL21<br>IC50<br>( $\mu$ M) | mCCR7/<br>CCL19<br>IC50<br>( $\mu$ M) | mCCR7/<br>CCL21<br>IC50<br>( $\mu$ M) |
|---------------------------|---------------------|---------------------------------------|---------------|----------------------------|---------------------------------------|---------------------------------------|---------------------------------------|
| UNC10150582<br>"Cosalane" | SRI-18287           | 0.207                                 | Non-Reactive  | >50                        | 2.66                                  | 0.193                                 | 1.98                                  |
| UNC10150759               | SRI-19093           | 8.9                                   | Non-Reactive  | >50                        | 7.6                                   | 9.3                                   | NP                                    |
| UNC10155741               | SRI-10238           | 7.9                                   | Non-Reactive  | >50                        | 5.4                                   | 11                                    | NP                                    |
| UNC10146458               | SRI-26043           | 7.6                                   | Non-Reactive  | >50                        | 7                                     | 8.3                                   | NP                                    |
| UNC10151089               | SRI-6596            | 9                                     | Non-Reactive  | >50                        | 4.2                                   | 7.6                                   | NP                                    |
| UNC10219981               | SRI-25714           | 8.4                                   | Non-Reactive  | >50                        | 6.4                                   | 10.7                                  | NP                                    |
| UNC10225619               | LCGC-<br>91877      | 1.8                                   | Non-Reactive  | >100                       | 4.1                                   | NP                                    | NP                                    |
| UNC10242795               | LCGC-<br>011_168832 | 4.4                                   | Non-Reactive  | >100                       | 2.8                                   | 5.2                                   | NP                                    |
| UNC10242782               | LCGC-<br>009_279471 | 6.8                                   | Non-Reactive  | >100                       | 2                                     | 3.9                                   | NP                                    |
| UNC10242786               | LCGC-<br>010_190415 | 10                                    | Non-Reactive  | >100                       | 8.6                                   | 18.2                                  | NP                                    |
| UNC10242753               | LCGC-<br>007_11213  | 5.2                                   | Non-Reactive  | >100                       | 2.7                                   | 4.6                                   | NP                                    |
| UNC10220221               | LCGC-<br>010_189652 | 9.3                                   | Non-Reactive  | >100                       | 8.1                                   | 10.4                                  | NP                                    |
| UNC10242764               | LCGC-<br>008_140602 | 8.2                                   | Non-Reactive  | >100                       | 6.7                                   | 27                                    | NP                                    |
| UNC10242794               | LCGC-<br>011_168049 | 10.3                                  | Non-Reactive  | >100                       | 4.3                                   | 8                                     | NP                                    |

**Supplemental Table:** IC<sub>50</sub>s for 14 confirmed/progressed hits against human and where indicated mouse CCR7 in DiscoverX PathHunter®  $\beta$ -Arrestin CHO K1 cells are depicted. NP = Not Performed.

# Supplemental Figure 3

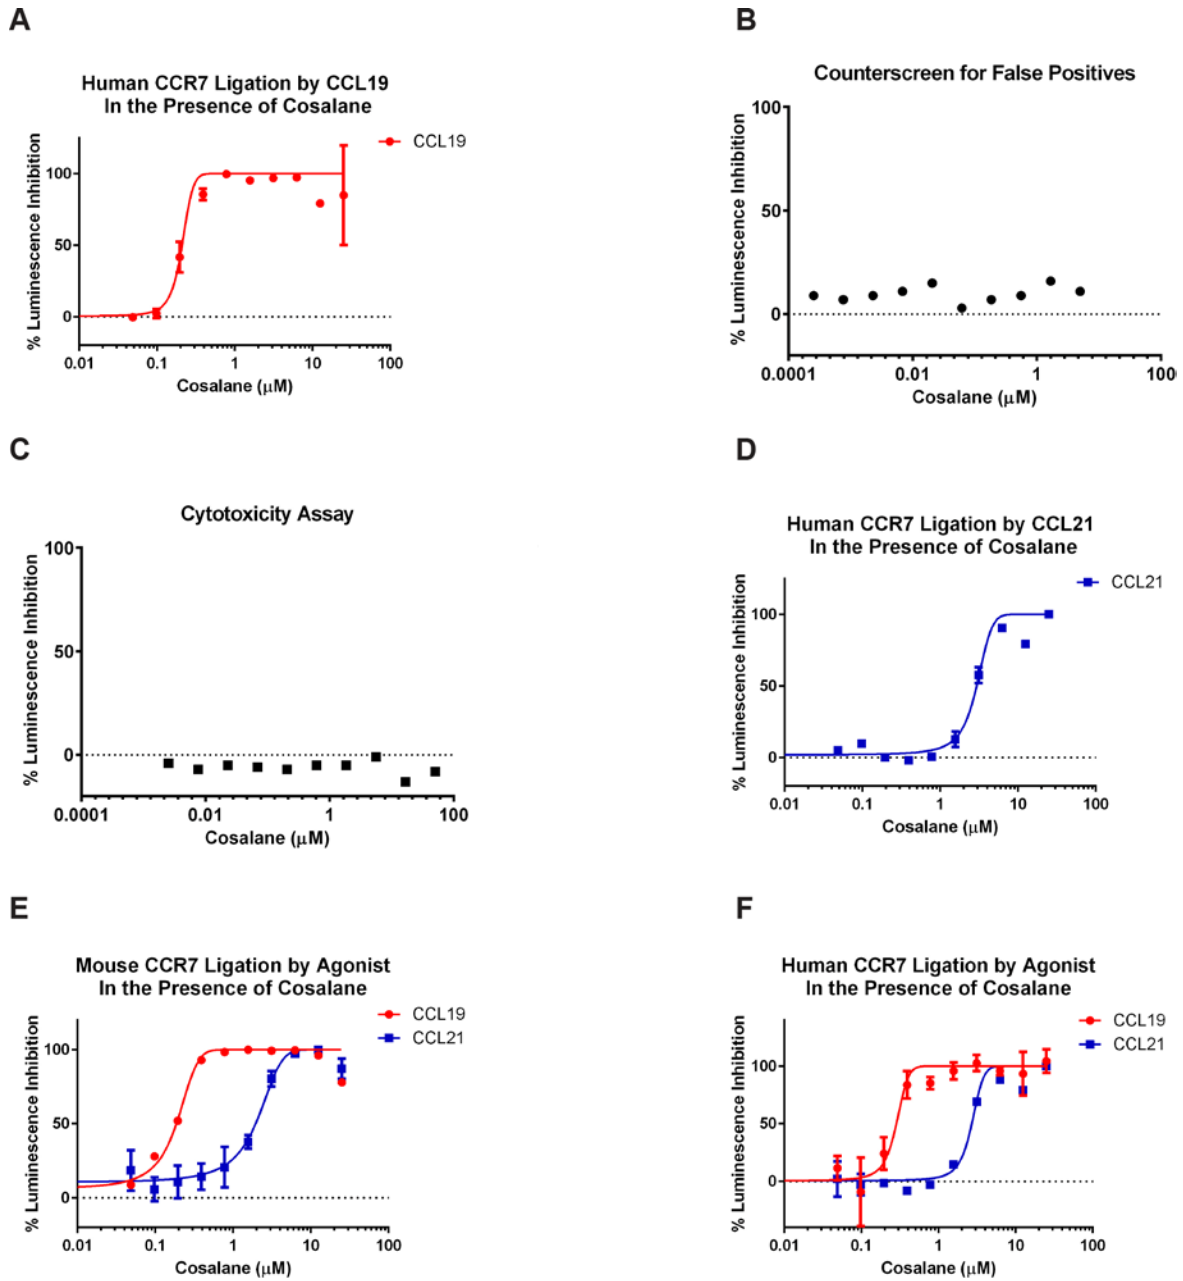

Supplemental Figure 3: Primary Bio-Luminescence Data for Cosalane During Compound Progression (A) Dose response curve for cosalane (Southern Research)

against hCCR7/CCL19 in DiscoverX PathHunter®  $\beta$ -Arrestin CHO K1 cells. Y-axis represents bioluminescence percent inhibition by cosalane compared to cells not exposed to inhibitor (B) Counterscreen for cosalane against hCCR7/CCL19 in DiscoverX PathHunter®  $\beta$ -Arrestin CHO K1 cells in which cosalane was added to cell cultures after the agonist incubation period had already been completed. (C) HeLA cells were incubated with cosalane for 72 hours and subsequently lysed. The amount of liberated ATP was then determined using a commercially available bioluminescence assay. (D) Dose response curve for cosalane against hCCR7/CCL21 in DiscoverX PathHunter®  $\beta$ -Arrestin CHO K1 cells. (E) Dose response curve for cosalane against mCCR7/CCL19 and mCCR7/CCL21 in DiscoverX PathHunter®  $\beta$ -Arrestin CHO K1 cells. (F) Dose response curve for a separate batch of cosalane synthesized at UNC against hCCR7/CCL19 and hCCR7/CCL21 in DiscoverX PathHunter®  $\beta$ -Arrestin CHO K1 cells
